# Supplementary material
Source: PubMed Central journal article supplement (PMC4250944)
Supplement: Supp_Fig2.pdf [file Supp_Fig2.pdf]

### Monolayer CD90 Expression Levels

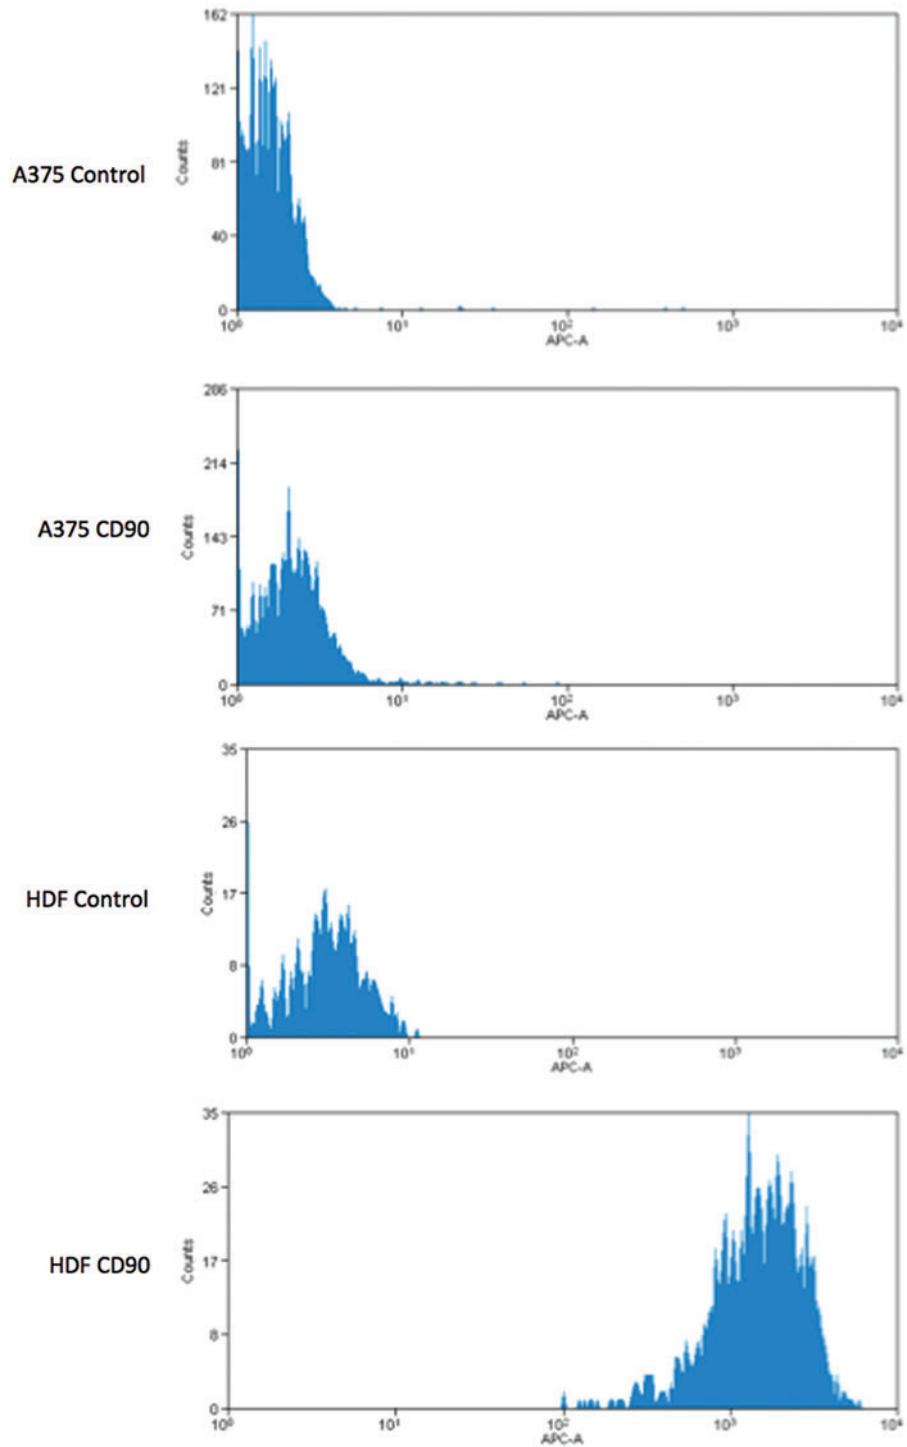

**SUPPLEMENTARY FIG. S2.** Flow cytometry profiles of A375Luc705 or HDF cells either unstained or stained with CD90-APC.
